# Supplementary material for: Unveiling the Patterns of Water Diuresis in Profound Hyponatremia Management in Intensive Care Unit Settings
Source: PubMed Central journal article supplement — Kidney360. 2024 Aug 9;5(10):1435–45. doi: 10.34067/KID.0000000000000535 (PMC11556906; doi:10.34067/kid.0000000000000535), 2024-08-09

**Supplementary Table 1: Comparison of baseline characteristics of patients with and without water diuresis**

|                                                                | Water diuresis group, n=30 | No water diuresis group, n=17 |
|----------------------------------------------------------------|----------------------------|-------------------------------|
| Age, yr median (IQR)                                           | 71 (54–83)                 | 77 (56–82)                    |
| Female, n (%)                                                  | 16 (53)                    | 9 (53)                        |
| Community onset, n (%)                                         | 26 (87)                    | 13 (76)                       |
| Body mass index, kg/m <sup>2</sup> median (IQR)                | 20 (18–23)                 | 22 (18–25)                    |
| Symptomatic, n (%)                                             | 28 (93)                    | 13 (76)                       |
| Severe symptom, n (%)                                          | 11 (37)                    | 7 (41)                        |
| Moderate symptom, n (%)                                        | 17 (57)                    | 6 (35)                        |
| <b>Comorbidities, n (%)</b>                                    |                            |                               |
| Myocardial infarction                                          | 0                          | 1 (6)                         |
| Congestive heart failure                                       | 6 (20)                     | 5 (29)                        |
| Cerebrovascular disease                                        | 0                          | 3 (18)                        |
| Diabetes                                                       | 6 (20)                     | 7 (41)                        |
| Chronic kidney disease                                         | 1 (3)                      | 4 (24)                        |
| Solid tumor                                                    | 2 (7)                      | 1 (6)                         |
| Charlson comorbidity index, median (IQR)                       | 1 (1–2)                    | 2 (1–4)                       |
| <b>Laboratory data at hyponatremia diagnosis, median (IQR)</b> |                            |                               |
| Sodium, mEq/L                                                  | 111 (108–114)              | 117 (110–118)                 |
| Potassium, mEq/L                                               | 4.2 (3.7–4.7)              | 4.7 (4.0–5.5)                 |
| Creatinine, mg/dL                                              | 0.59 (0.41–0.76)           | 0.96 (0.71–2.98)              |
| eGFR, ml/min/1.73m <sup>2</sup>                                | 102 (62–124)               | 54 (17–79)                    |
| Uric acid, mg/dL                                               | 3.1 (2.0–5.0)              | 5.7 (3.3–7.8)                 |
| Serum osmolality, mOsm/kg                                      | 232 (227–240)              | 243 (237–268)                 |
| Albumin, g/dL                                                  | 3.9 (3.6–4.2)              | 3.3 (2.7–4.1)                 |
| Glucose, mg/dL                                                 | 120 (103–145)              | 137 (97–161)                  |
| Urine sodium, mEq/L                                            | 30 (15–70)                 | 64 (34–83)                    |
| Urine potassium, mEq/L                                         | 23 (13–35)                 | 40 (26–49)                    |
| Urine osmolality, mEq/L                                        | 350 (251–435)              | 351 (297–469)                 |
| <b>Cause of hyponatremia, n (%)</b>                            |                            |                               |
| Primary polydipsia                                             | 8 (27)                     | 0                             |
| Hypovolemic                                                    | 7 (23)                     | 3 (18)                        |
| SIAD                                                           | 7 (23)                     | 7 (41)                        |
| Adrenal insufficiency                                          | 0                          | 0                             |
| Drug related                                                   | 10 (33)                    | 5 (29)                        |
| Heart failure                                                  | 1 (3)                      | 2 (12)                        |
| Unidentified cause                                             | 2 (7)                      | 3 (18)                        |
| <b>Daily use medication, n (%)</b>                             |                            |                               |
| Thiazide diuretics                                             | 4 (13)                     | 3 (18)                        |
| Loop diuretics                                                 | 3 (10)                     | 7 (41)                        |
| Aldosterone antagonists                                        | 4 (13)                     | 5 (29)                        |
| NSAIDs                                                         | 5 (17)                     | 5 (29)                        |
| SSRI/SNRI                                                      | 5 (17)                     | 2 (12)                        |
| Antiseizure medication                                         | 4 (13)                     | 2 (12)                        |

Abbreviations: IQR, interquartile range; BP, blood pressure; eGFR, estimated glomerular filtration rate; SIAD, syndrome of inappropriate secretion of antidiuresis; NSAIDs, non-steroidal anti-inflammatory drugs; SSRI, selective serotonin reuptake inhibitors; SNRI, serotonin noradrenaline reuptake inhibitor. Categorical variables are shown as numbers (percentages) and continuous variables as medians (25–75 percentiles)

**Supplementary Table 2: Correction method and outcomes of patients with and without water diuresis**

|                                                                                                                                                                                                                             | Water diuresis group, n=30 | No water diuresis group, n=17 |
|-----------------------------------------------------------------------------------------------------------------------------------------------------------------------------------------------------------------------------|----------------------------|-------------------------------|
| <b>Correction method</b>                                                                                                                                                                                                    |                            |                               |
| Infusate and fluid loss formula, n (%)                                                                                                                                                                                      | 21 (70)                    | 11 (65)                       |
| Normal saline, n (%)                                                                                                                                                                                                        | 17 (57)                    | 7 (41)                        |
| Hypertonic saline bolus infusion, n (%)                                                                                                                                                                                     | 11 (37)                    | 4 (24)                        |
| Hypertonic saline continuous infusion, n (%)                                                                                                                                                                                | 13 (43)                    | 8 (47)                        |
| Electrolyte repletion, n (%)                                                                                                                                                                                                | 5 (17)                     | 2 (12)                        |
| Loop diuretics, n (%)                                                                                                                                                                                                       | 2 (7)                      | 1 (6)                         |
| Vaptans, n (%)                                                                                                                                                                                                              | 0 (0)                      | 0 (0)                         |
| Dextrose 5% in water, n (%)                                                                                                                                                                                                 | 29 (97)                    | 4 (27)                        |
| Desmopressin, n (%)                                                                                                                                                                                                         | 21 (72)                    | N/A                           |
| <b>Number of measurements in the first 24 hours</b>                                                                                                                                                                         |                            |                               |
| Serum sodium concentration                                                                                                                                                                                                  | 8 (6–11)                   | 8 (6–10)                      |
| Urine volume                                                                                                                                                                                                                | 10 (8–12)                  | 9 (7–10)                      |
| Urinary sodium plus potassium concentration                                                                                                                                                                                 | 6 (4–7)                    | 5 (4–6)                       |
| <b>Outcome</b>                                                                                                                                                                                                              |                            |                               |
| Change of serum sodium at 24 hours, mEq/L                                                                                                                                                                                   | 8 (6–9)                    | 6 (5–8)                       |
| Change of serum sodium at 48 hours, mEq/L                                                                                                                                                                                   | 12 (9–15)                  | 10 (9–13)                     |
| Undercorrection, n (%)                                                                                                                                                                                                      | 1 (3)                      | 0                             |
| Appropriate correction, n (%)                                                                                                                                                                                               | 28 (93)                    | 15 (88)                       |
| Overcorrection, n (%)                                                                                                                                                                                                       | 1 (3)                      | 2 (12)                        |
| Length of ICU stay, day (IQR)                                                                                                                                                                                               | 4 (3–6)                    | 4 (3–6)                       |
| ODS, n (%)                                                                                                                                                                                                                  | 0 (0)                      | 0 (0)                         |
| Mortality, n (%)                                                                                                                                                                                                            | 1 (3)                      | 2 (12)                        |
| Abbreviations: IQR, interquartile range; ICU, intensive care unit; ODS, osmotic demyelination syndrome<br>Categorical variables are shown as numbers (percentages), and continuous variables as medians (25–75 percentiles) |                            |                               |

**Supplementary Figure 1: Predictive correction by infusate and fluid loss formula**

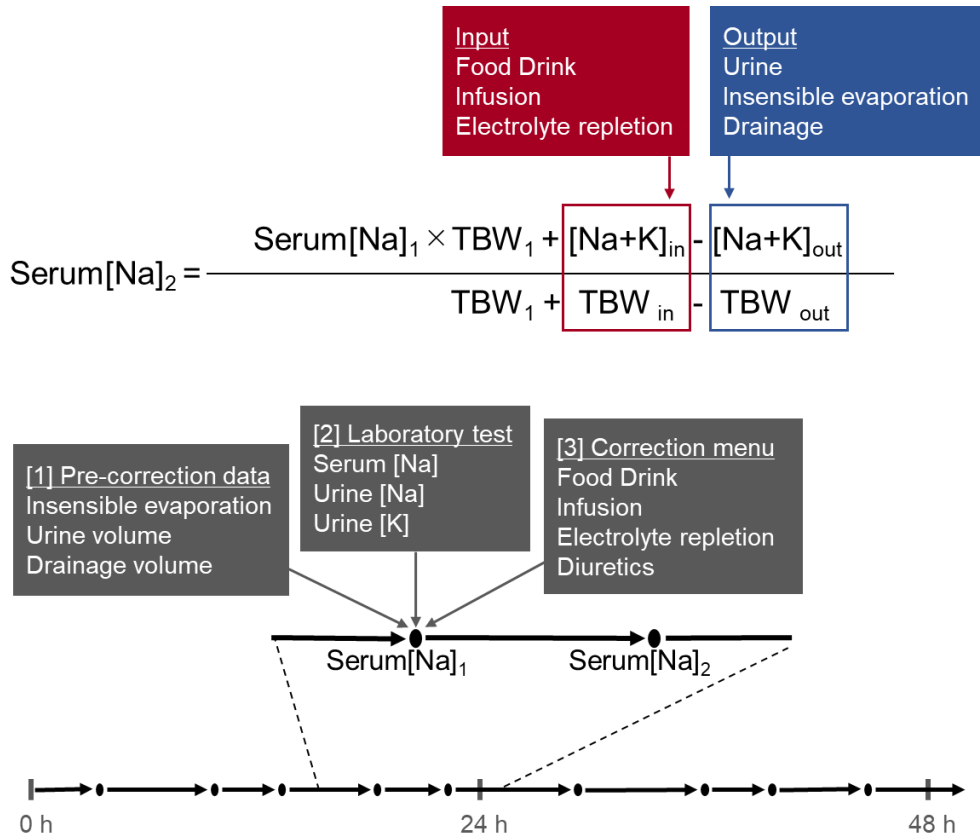

Supplement: kidney360-5-1435-s002.pdf [file kidney360-5-1435-s002.pdf]
