# Supplementary material for: Unveiling the Patterns of Water Diuresis in Profound Hyponatremia Management in Intensive Care Unit Settings
Source: PubMed Central journal article supplement — Kidney360. 2024 Aug 9;5(10):1435–45. doi: 10.34067/KID.0000000000000535 (PMC11556906; doi:10.34067/kid.0000000000000535), 2024-08-09
Supplement: kidney360-5-1435-s001.pdf [file kidney360-5-1435-s001.pdf]

## ASN Journal Disclosure Form

As per ASN journal policy, I have disclosed any financial relationships or commitments I have held in the past 36 months as included below. I have listed my Current Employer below to indicate there is a relationship requiring disclosure. If no relationship exists, my Current Employer is not listed.

Y. Fujita has nothing to disclose.

I understand that the information above will be published within the journal article, if accepted, and that failure to comply and/or to accurately and completely report the potential financial conflicts of interest could lead to the following: 1) Prior to publication, article rejection, or 2) Post-publication, sanctions ranging from, but not limited to, issuing a correction, reporting the inaccurate information to the authors' institution, banning authors from submitting work to ASN journals for varying lengths of time, and/or retraction of the published work.

Name: Yoshiro Fujita

Manuscript ID: K360-2024-000393R1

Manuscript Title: Unveiling the patterns of water diuresis diuresis in Profound hyponatremia management in intensive care unit settings.

Date of Completion: July 22, 2024

Disclosure Updated Date: July 22, 2024

## ASN Journal Disclosure Form

As per ASN journal policy, I have disclosed any financial relationships or commitments I have held in the past 36 months as included below. I have listed my Current Employer below to indicate there is a relationship requiring disclosure. If no relationship exists, my Current Employer is not listed.

H. Ikai has nothing to disclose.

I understand that the information above will be published within the journal article, if accepted, and that failure to comply and/or to accurately and completely report the potential financial conflicts of interest could lead to the following: 1) Prior to publication, article rejection, or 2) Post-publication, sanctions ranging from, but not limited to, issuing a correction, reporting the inaccurate information to the authors' institution, banning authors from submitting work to ASN journals for varying lengths of time, and/or retraction of the published work.

Name: Hiroki Ikai

Manuscript ID: K360-2024-000393R1

Manuscript Title: Unveiling the patterns of water diuresis in Profound hyponatremia management in intensive care unit settings

Date of Completion: July 21, 2024

Disclosure Updated Date: July 21, 2024

## ASN Journal Disclosure Form

As per ASN journal policy, I have disclosed any financial relationships or commitments I have held in the past 36 months as included below. I have listed my Current Employer below to indicate there is a relationship requiring disclosure. If no relationship exists, my Current Employer is not listed.

T. Imaizumi reports the following:

Consultancy: GlaxoSmithKline; Research Funding: Kyowa Kirin Co., Ltd.; and Honoraria: Kyowa Kirin Co., Ltd.

I understand that the information above will be published within the journal article, if accepted, and that failure to comply and/or to accurately and completely report the potential financial conflicts of interest could lead to the following: 1) Prior to publication, article rejection, or 2) Post-publication, sanctions ranging from, but not limited to, issuing a correction, reporting the inaccurate information to the authors' institution, banning authors from submitting work to ASN journals for varying lengths of time, and/or retraction of the published work.

Name: Takahiro Imaizumi

Manuscript ID: K360-2024-000393R1

Manuscript Title: Unveiling the patterns of water diuresis in Profound hyponatremia management in intensive care unit settings

Date of Completion: July 19, 2024

Disclosure Updated Date: May 1, 2024

## ASN Journal Disclosure Form

As per ASN journal policy, I have disclosed any financial relationships or commitments I have held in the past 36 months as included below. I have listed my Current Employer below to indicate there is a relationship requiring disclosure. If no relationship exists, my Current Employer is not listed.

Y. Ito has nothing to disclose.

I understand that the information above will be published within the journal article, if accepted, and that failure to comply and/or to accurately and completely report the potential financial conflicts of interest could lead to the following: 1) Prior to publication, article rejection, or 2) Post-publication, sanctions ranging from, but not limited to, issuing a correction, reporting the inaccurate information to the authors' institution, banning authors from submitting work to ASN journals for varying lengths of time, and/or retraction of the published work.

Name: Yuuki Ito

Manuscript ID: K360-2024-000393R1

Manuscript Title: Unveiling the patterns of water diuresis in Profound hyponatremia management in intensive care unit settings

Date of Completion: July 21, 2024

Disclosure Updated Date: July 21, 2024

## ASN Journal Disclosure Form

As per ASN journal policy, I have disclosed any financial relationships or commitments I have held in the past 36 months as included below. I have listed my Current Employer below to indicate there is a relationship requiring disclosure. If no relationship exists, my Current Employer is not listed.

K. Iwasaki reports the following:

Employer: CHUBU ROSAI HOSPITAL

I understand that the information above will be published within the journal article, if accepted, and that failure to comply and/or to accurately and completely report the potential financial conflicts of interest could lead to the following: 1) Prior to publication, article rejection, or 2) Post-publication, sanctions ranging from, but not limited to, issuing a correction, reporting the inaccurate information to the authors' institution, banning authors from submitting work to ASN journals for varying lengths of time, and/or retraction of the published work.

Name: Keita Iwasaki

Manuscript ID: K360-2024-000393R1

Manuscript Title: Unveiling the patterns of water diuresis in Profound hyponatremia management in intensive care unit settings.

Date of Completion: July 26, 2024

Disclosure Updated Date: July 26, 2024

## ASN Journal Disclosure Form

As per ASN journal policy, I have disclosed any financial relationships or commitments I have held in the past 36 months as included below. I have listed my Current Employer below to indicate there is a relationship requiring disclosure. If no relationship exists, my Current Employer is not listed.

Yukari Murai reports the following:

Honoraria: ????; ????????

I understand that the information above will be published within the journal article, if accepted, and that failure to comply and/or to accurately and completely report the potential financial conflicts of interest could lead to the following: 1) Prior to publication, article rejection, or 2) Post-publication, sanctions ranging from, but not limited to, issuing a correction, reporting the inaccurate information to the authors' institution, banning authors from submitting work to ASN journals for varying lengths of time, and/or retraction of the published work.

Name: Yukari Murai

Manuscript ID: K360-2024-000393R1

Manuscript Title: Unveiling the patterns of water diuresis in Profound hyponatremia management in intensive care unit settings

Date of Completion: July 18, 2024

Disclosure Updated Date: July 18, 2024

## ASN Journal Disclosure Form

As per ASN journal policy, I have disclosed any financial relationships or commitments I have held in the past 36 months as included below. I have listed my Current Employer below to indicate there is a relationship requiring disclosure. If no relationship exists, my Current Employer is not listed.

F. Nagase reports the following:  
Employer: Chubu Rosai Hospital

I understand that the information above will be published within the journal article, if accepted, and that failure to comply and/or to accurately and completely report the potential financial conflicts of interest could lead to the following: 1) Prior to publication, article rejection, or 2) Post-publication, sanctions ranging from, but not limited to, issuing a correction, reporting the inaccurate information to the authors' institution, banning authors from submitting work to ASN journals for varying lengths of time, and/or retraction of the published work.

Name: Fumika N. Nagase

Manuscript ID: K360-2024-000393R1

Manuscript Title: Unveiling the patterns of water diuresis in Profound hyponatremia management in intensive care unit settings.

Date of Completion: July 8, 2024

Disclosure Updated Date: July 8, 2024

## ASN Journal Disclosure Form

As per ASN journal policy, I have disclosed any financial relationships or commitments I have held in the past 36 months as included below. I have listed my Current Employer below to indicate there is a relationship requiring disclosure. If no relationship exists, my Current Employer is not listed.

K. Nagase reports the following:

Employer: Yokkaichi Municipal Hospital, Chubu Rosai Hospital

I understand that the information above will be published within the journal article, if accepted, and that failure to comply and/or to accurately and completely report the potential financial conflicts of interest could lead to the following: 1) Prior to publication, article rejection, or 2) Post-publication, sanctions ranging from, but not limited to, issuing a correction, reporting the inaccurate information to the authors' institution, banning authors from submitting work to ASN journals for varying lengths of time, and/or retraction of the published work.

Name: Koya Nagase

Manuscript ID: K360-2024-000393R1

Manuscript Title: Unveiling the patterns of water diuresis in Profound hyponatremia management in intensive care unit settings.

Date of Completion: July 8, 2024

Disclosure Updated Date: July 8, 2024



## ASN Journal Disclosure Form

As per ASN journal policy, I have disclosed any financial relationships or commitments I have held in the past 36 months as included below. I have listed my Current Employer below to indicate there is a relationship requiring disclosure. If no relationship exists, my Current Employer is not listed.

Y. Nakamura reports the following:

Employer: Nagoya University Graduate School of Medicine

I understand that the information above will be published within the journal article, if accepted, and that failure to comply and/or to accurately and completely report the potential financial conflicts of interest could lead to the following: 1) Prior to publication, article rejection, or 2) Post-publication, sanctions ranging from, but not limited to, issuing a correction, reporting the inaccurate information to the authors' institution, banning authors from submitting work to ASN journals for varying lengths of time, and/or retraction of the published work.

Name: Yoshihiro Nakamura

Manuscript ID: K360-2024-000393R1

Manuscript Title: Unveiling the patterns of water diuresis in Profound hyponatremia management in intensive care unit settings.

Date of Completion: July 9, 2024

Disclosure Updated Date: July 9, 2024

## ASN Journal Disclosure Form

As per ASN journal policy, I have disclosed any financial relationships or commitments I have held in the past 36 months as included below. I have listed my Current Employer below to indicate there is a relationship requiring disclosure. If no relationship exists, my Current Employer is not listed.

H. Shimizu reports the following:

Employer: Daido Hospital; and Speakers Bureau: Mitsubishi Tanabe Pharma co., AstraZeneca kk., Kowa co., Kyowa Kirin Co.,Ltd., KiSSEI Pharmaceutical Co.,LTD., Chugai Pharmaceutical Co.,Ltd., Novonordisk, Tsumura & Co., Torii Pharmaceutical Co., Otuka Pharmaceutical Co., MochidaPharmaceutical Co.,Ltd., Astellas Pharma Inc.

I understand that the information above will be published within the journal article, if accepted, and that failure to comply and/or to accurately and completely report the potential financial conflicts of interest could lead to the following: 1) Prior to publication, article rejection, or 2) Post-publication, sanctions ranging from, but not limited to, issuing a correction, reporting the inaccurate information to the authors' institution, banning authors from submitting work to ASN journals for varying lengths of time, and/or retraction of the published work.

Name: Hideaki Shimizu

Manuscript ID: K360-2024-000393R1

Manuscript Title: Unveiling the patterns of water diuresis in Profound hyponatremia management in intensive care unit settings

Date of Completion: July 12, 2024

Disclosure Updated Date: July 12, 2024

## ASN Journal Disclosure Form

As per ASN journal policy, I have disclosed any financial relationships or commitments I have held in the past 36 months as included below. I have listed my Current Employer below to indicate there is a relationship requiring disclosure. If no relationship exists, my Current Employer is not listed.

N. Takizawa reports the following:

Employer: Chubu Rosai Hospital; and Speakers Bureau: Chugai, GlaxoSmithKline, Mitsubishi Tanabe , AbbVie, Eli Lilly, Pfizer.

I understand that the information above will be published within the journal article, if accepted, and that failure to comply and/or to accurately and completely report the potential financial conflicts of interest could lead to the following: 1) Prior to publication, article rejection, or 2) Post-publication, sanctions ranging from, but not limited to, issuing a correction, reporting the inaccurate information to the authors' institution, banning authors from submitting work to ASN journals for varying lengths of time, and/or retraction of the published work.

Name: Naoho Takizawa

Manuscript ID: K360-2024-000393R1

Manuscript Title: Unveiling the patterns of water diuresis in Profound hyponatremia management in intensive care unit settings.

Date of Completion: July 9, 2024

Disclosure Updated Date: July 9, 2024

## ASN Journal Disclosure Form

As per ASN journal policy, I have disclosed any financial relationships or commitments I have held in the past 36 months as included below. I have listed my Current Employer below to indicate there is a relationship requiring disclosure. If no relationship exists, my Current Employer is not listed.

T. Watanabe reports the following:  
Employer: Chubu Rosai Hospital

I understand that the information above will be published within the journal article, if accepted, and that failure to comply and/or to accurately and completely report the potential financial conflicts of interest could lead to the following: 1) Prior to publication, article rejection, or 2) Post-publication, sanctions ranging from, but not limited to, issuing a correction, reporting the inaccurate information to the authors' institution, banning authors from submitting work to ASN journals for varying lengths of time, and/or retraction of the published work.

Name: Tsuyoshi Watanabe

Manuscript ID: K360-2024-000393R1

Manuscript Title: Unveiling the patterns of water diuresis in Profound hyponatremia management in intensive care unit settings

Date of Completion: July 18, 2024

Disclosure Updated Date: July 18, 2024

## ASN Journal Disclosure Form

As per ASN journal policy, I have disclosed any financial relationships or commitments I have held in the past 36 months as included below. I have listed my Current Employer below to indicate there is a relationship requiring disclosure. If no relationship exists, my Current Employer is not listed.

M. Yamamoto has nothing to disclose.

I understand that the information above will be published within the journal article, if accepted, and that failure to comply and/or to accurately and completely report the potential financial conflicts of interest could lead to the following: 1) Prior to publication, article rejection, or 2) Post-publication, sanctions ranging from, but not limited to, issuing a correction, reporting the inaccurate information to the authors' institution, banning authors from submitting work to ASN journals for varying lengths of time, and/or retraction of the published work.

Name: Mari Yamamoto

Manuscript ID: K360-2024-000393R1

Manuscript Title: Unveiling the patterns of water diuresis in Profound hyponatremia management in intensive care unit settings.

Date of Completion: July 27, 2024

Disclosure Updated Date: July 27, 2024

## ASN Journal Disclosure Form

As per ASN journal policy, I have disclosed any financial relationships or commitments I have held in the past 36 months as included below. I have listed my Current Employer below to indicate there is a relationship requiring disclosure. If no relationship exists, my Current Employer is not listed.

W. Yokoyama-Kokuryo reports the following:  
Employer: Chubu-Rosai Hospital

I understand that the information above will be published within the journal article, if accepted, and that failure to comply and/or to accurately and completely report the potential financial conflicts of interest could lead to the following: 1) Prior to publication, article rejection, or 2) Post-publication, sanctions ranging from, but not limited to, issuing a correction, reporting the inaccurate information to the authors' institution, banning authors from submitting work to ASN journals for varying lengths of time, and/or retraction of the published work.

Name: Waka Yokoyama-Kokuryo

Manuscript ID: K360-2024-000393R1

Manuscript Title: Unveiling the patterns of water diuresis in Profound hyponatremia management in intensive care unit settings

Date of Completion: July 10, 2024

Disclosure Updated Date: July 10, 2024
